# Supplementary material
Source: Springer Nature journal article supplement (https://www.springermedizin.de/resource/supplementary/12936_2005_158_MOESM4_ESM.pdf/9547018)

2a)

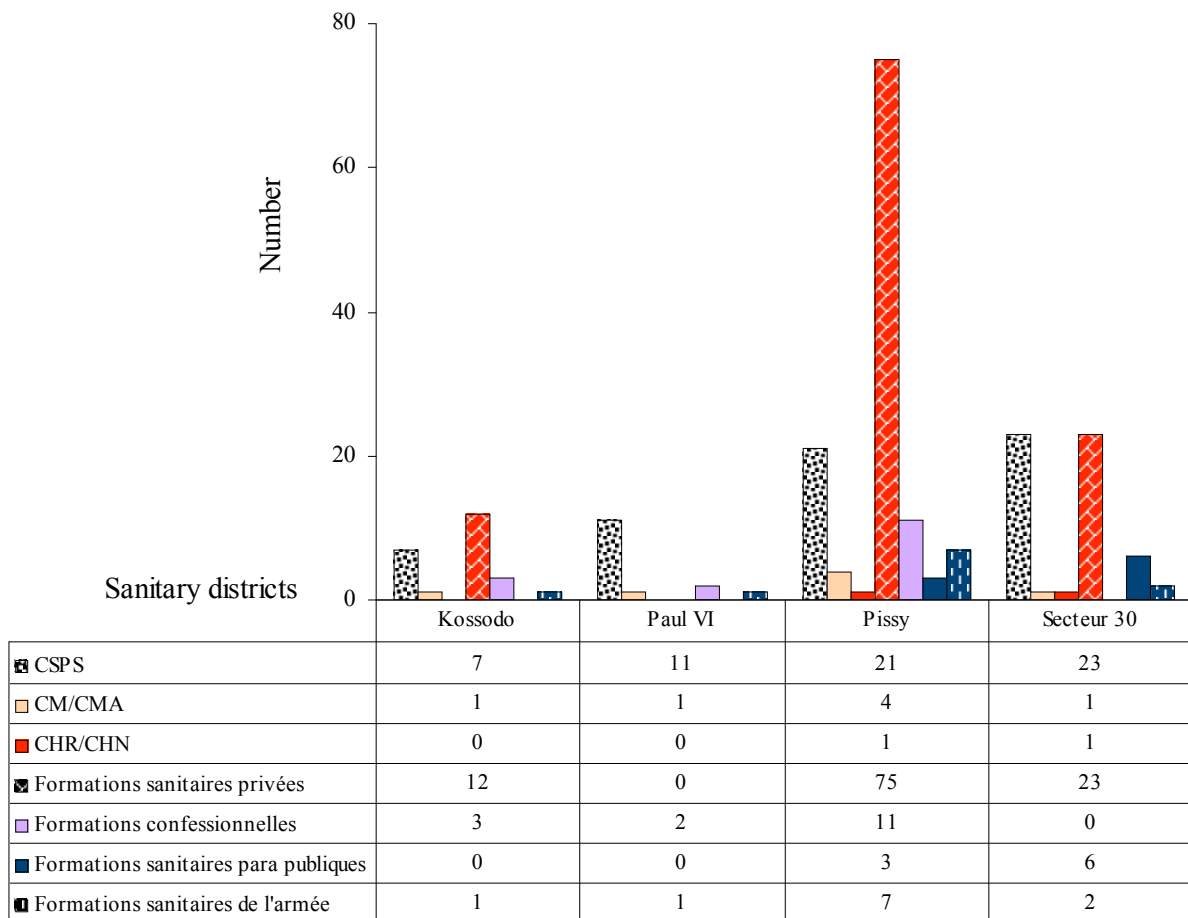

2b)

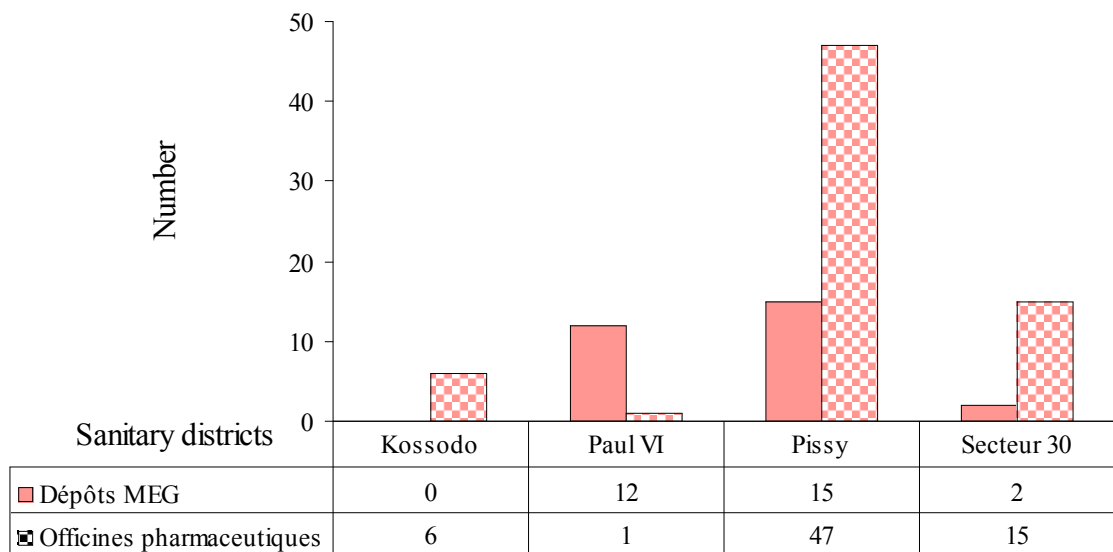

Supplement: MOESM4 [file 9547018]
